# Supplementary material
Source: publisher figshare collection journal article supplement (https://acs.figshare.com/ndownloader/files/28175404)
Supplement: Supplementary file 1 [file 28175404]

## Supporting Information

### Screening transition metals (Mn, Fe, Co, Cu) promoted Ni-based CO<sub>2</sub> methanation bimetal catalysts with advanced low-temperature activities

Leilei Xu <sup>a\*</sup>, Yan Cui <sup>a</sup>, Mindong Chen <sup>a\*</sup>, Xueying Wen <sup>a</sup>, Chufei Lv <sup>a</sup>, Xianyun Wu <sup>a</sup>, Cai-e Wu <sup>b</sup>,

Zhichao Miao <sup>c</sup>, Xun Hu <sup>d\*</sup>

<sup>a</sup> Collaborative Innovation Center of the Atmospheric Environment and Equipment Technology, School of Environmental Science and Engineering, Nanjing University of Information Science & Technology, Jiangsu Key Laboratory of Atmospheric Environment Monitoring and Pollution Control, 210044, Nanjing, China

<sup>b</sup> College of Light Industry and Food Engineering, Nanjing Forestry University, Nanjing 210037, China

<sup>c</sup> School of Chemistry and Chemical Engineering, Shandong University of Technology, Zibo 255049, China

<sup>d</sup> School of Material Science and Engineering, University of Jinan, Jinan, 250022, China.

\*Corresponding author: [leileixu88@gmail.com](mailto:leileixu88@gmail.com) (L. Xu), [chenmdnuist@163.com](mailto:chenmdnuist@163.com) (M. Chen), [Xun.Hu@outlook.com](mailto:Xun.Hu@outlook.com) (X. Hu).

## Experimental

### ***S1. The fabrication of the mesoporous Ce-Zr solid solution support***

Mesoporous Ce-Zr solid solution material ( $\text{Ce}_{0.8}\text{Zr}_{0.2}\text{O}_2$ ) was synthesized by evaporation-induced self-assembly (EISA) strategy reported elsewhere.<sup>1, 2</sup> In the process of synthesizing the material, 1.0 g P123 ( $M_w = 5800$ ,  $\text{EO}_{20}\text{PO}_{70}\text{EO}_{20}$ , Aladdin) was first dissolved in 20.0 ml anhydrous ethanol ( $\text{C}_2\text{H}_5\text{OH}$ , Sinopharm Holding Chemical Reagent Co., Ltd.) with vigorous magnetic stirring. Then, 8 mmol  $\text{Ce}(\text{NO}_3)_3 \cdot 6\text{H}_2\text{O}$  (Shanghai Macklin Bio-Chem Co., Ltd., China) and 2 mmol  $\text{ZrOCl}_2 \cdot 8\text{H}_2\text{O}$  (Shanghai Aladdin BioChem Co., Ltd., China) were sequentially added to above P123 solution with vigorous magnetic stirring until the solution became transparent. The transparent solution was stirred into a culture dish and covered with a PE membrane with small holes. The final solution was moved to a culture dish and placed in a 60 °C convection oven with relative humidity less than 50% for solvent volatilization and template assembly. After experiencing 48 h EISA process, the golden yellow dried gel in the culture dish was transferred to the crucible and calcined at 500 °C for 5 h. The final mesoporous Ce-Zr solid solution with the 80/20 Ce/Zr molar ratio was abbreviated as M-Ce80Zr20.

### ***S2. The preparation of the catalysts***

The  $\text{Ni}(\text{NO}_3)_2 \cdot 6\text{H}_2\text{O}$ ,  $\text{Mn}(\text{NO}_3)_2 \cdot 4\text{H}_2\text{O}$ ,  $\text{Co}(\text{NO}_3)_2 \cdot 6\text{H}_2\text{O}$ ,  $\text{Cu}(\text{NO}_3)_2 \cdot 3\text{H}_2\text{O}$ ,  $\text{Fe}(\text{NO}_3)_3 \cdot 9\text{H}_2\text{O}$  (Shanghai Aladdin Bio-Chem Co., Ltd., China) were selected as the metal precursors and all the Ni-based bimetal catalysts were prepared by the incipient impregnation method using the M-Ce80Zr20 as the support. The weight percentages of the Ni and transition metal ( $T = \text{Mn}, \text{Co}, \text{Fe}, \text{Cu}$ ) were controlled at 12.0 wt.% and 3.0 wt.%, respectively. The catalyst precursors were dried in the 60 °C convection oven for overnight and then calcined at 600 °C for 5 h. The final bimetal

catalysts with 12 wt.% Ni and 3 wt.% transition metals were denoted as 12Ni3T/M-Ce80Zr20 (T = Mn, Co, Fe, Cu). Besides, the Ni-Co bimetal catalysts with different Ni ( $x$  wt.%) and Co ( $y$  wt.%) loading amounts ( $x + y = 15$ ) were also prepared with the same protocol and the final catalysts were defined as  $x\text{Ni}y\text{Co}/\text{M-Ce80Zr20}$ .

### ***S3. Catalyst characterizations***

The X-ray powder diffraction (XRD) patterns of the catalysts were recorded on a XRD-6100 diffractometer (Shimadzu, Japan) with Cu K $\alpha$  radiation and scanning rate of 3°/min in the range of 20°–80°.

The N<sub>2</sub> physisorption analysis was carried out on an Autosorb-iQ-AG-MP instrument (Quantachrome, US). For each test, the sample was pretreated by degassing at 300 °C for 3 h. The Brunauer-Emmett-Teller (BET) specific surface area, Barret-Joyner-Halenda (BJH) pore volume, and pore size distribution of the sample were calculated based on the N<sub>2</sub> adsorption branch of the isotherm.

Transmission electron microscopy (TEM) images, selected area electron diffraction (SAED), scanning transmission electron microscopy (STEM) images, and energy-dispersed spectroscopy (EDS) mapping were taken on a high-resolution transmission electron microscopy (FEI TECNAI G2 F20) at an accelerated voltage of 200 kV. The sample was uniformly dispersed in absolute ethanol with the assistance of the ultrasonic and then dropped on the copper grid sample holder coated with carbon layer.

The valence state and composition of the surface elements in the catalysts were characterized by X-ray photoelectron spectroscopy (XPS) on the Escalab 250Xi (Thermo Fisher Scientific, US) spectrometer with the focused monochromatic Al-K source as the incident ray. The binding energy of the catalyst was calibrated by using C1s (284.5 eV) as the internal standard.

The H<sub>2</sub> temperature programmed reduction (H<sub>2</sub>-TPR) analyses of the catalysts were carried out on a micro fixed reactor with a LC-D200 mass spectrometer (TILON, US) as the detector. In a specific test, 200 mg sample was loaded in a quartz tube (i.d. = 5.0 mm). The sample was firstly

purged with Ar (20.0 mL/min) at 300 °C for 30 min before the regular analysis. Then, the 5 vol.% H<sub>2</sub>-95 vol.% Ar mixture stream (50.0 mL/min) was introduced. After the baseline of the H<sub>2</sub> mass signal ( $m/z = 2$ ) was stable, the temperature was programmatically increased from 25 °C to 800 °C with the rate of 20 °C/min and the H<sub>2</sub> mass signal was recorded with the LC-D200 mass spectrometer during the whole H<sub>2</sub>-TPR process.

The CO<sub>2</sub> temperature programmed desorption (CO<sub>2</sub>-TPD) analyses of the samples were analyzed on the same apparatus of the H<sub>2</sub>-TPR described above. Specifically, 100 mg of catalyst was loaded and absorbed CO<sub>2</sub> in CO<sub>2</sub> stream (10.0 mL/min) at 25 °C for 30 min. Then, the sample was purged by the Ar stream until the CO<sub>2</sub> baseline ( $m/z = 44$ ) was stable. Finally, the sample was programmatically heated from 25 °C to 800 °C with a ramp of 20 °C/min under Ar stream (40.0 mL/min) and the CO<sub>2</sub> signal during the CO<sub>2</sub>-TPD was recorded by the mass spectrometer.

Temperature Programmed surface reaction (TPSR) of the CO<sub>2</sub> methanation were performed on the same reactor as the H<sub>2</sub>-TPR and CO<sub>2</sub>-TPD. Specifically, the 200 mg of catalyst was loaded for each test. Before the TPSR test, the catalyst was reduced with the mixture of 50 vol.%H<sub>2</sub>-50 vol.%N<sub>2</sub> mixture stream (20 mL/min) at 500 °C for 180 min. Then, the reduced catalyst was purged by the Ar stream (20.0 mL/min) until cooled down to room temperature. The feed gases consisting of 80 vol.%H<sub>2</sub>-20 vol.%CO<sub>2</sub> (3.0 mL/min) and Ar (47.0 mL/min) were introduced into the catalyst bed until their baselines were stable. Finally, the TPSR of CO<sub>2</sub> methanation was carried out by increasing the reaction temperature from 25 °C to 500 °C with the heating rate of 10 °C/min. The trends of the reactants and products were recorded by the mass spectrometer.

The *in-situ* DRIFTS of CO<sub>2</sub> methanation was carried out on the Nicolet IS50 spectrometer equipped with a MCT detector. The detector was firstly cooled in liquid nitrogen and then the background and fundamental vectors were collected in vacuum condition. The CO<sub>2</sub>/H<sub>2</sub>/N<sub>2</sub> mixture gas was fed into the reactor cell and the temperature increased from 25 °C to 450 °C with the

heating rate of 10 °C/min. The reactor was cooled with circulating water during the test. The spectrum of sample was scanned from 400 cm<sup>-1</sup> to 4000 cm<sup>-1</sup> with a resolution of 7 cm<sup>-1</sup> and 32 scans at each temperature.

#### **S4. Catalyst evaluation**

Catalytic activity tests were conducted in a micro fixed bed reactor equipped with a quartz tube (i.d. = 10 mm) and the reaction quartz tube was placed vertically in a tube furnace. The temperature of the reaction was detected and controlled by the thermocouple located in the center of the catalyst bed. The gas flows of the feed gases are controlled by the mass flow controllers (MFC, Brooks Instrument) and the ratio of the reactants (H<sub>2</sub>/CO<sub>2</sub>) is controlled at 4/1 without any dilution. The reaction pressure are controlled at 1.0 atm and the reaction temperature is investigated in the range of 200-450 °C. For each test, 100 mg catalyst is loaded and the space velocity is set as 12000 mL/(g·h). Before catalytic reactions, the catalyst in the reactor was firstly pre-reduced with H<sub>2</sub>/N<sub>2</sub> = (10.0/10.0 mL/min) at 500 °C for 2 h. The Perkin Elmer GC-680 gas chromatograph equipped with thermal conductivity detector (TCD) and the hydrogen flame detector (FID) were used for online analysis of the products.

#### **References**

- (1) Xu, L.; Lian, X.; Chen, M.; Cui, Y.; Wang, F.; Li, W.; Huang, B. CO<sub>2</sub> methanation over Co-Ni bimetal-doped ordered mesoporous Al<sub>2</sub>O<sub>3</sub> catalysts with enhanced low-temperature activities, *Int. J. Hydrogen Energy*, **2018**, 43, 17172-17184.
- (2) Xu, L.; Song, H.; Chou, L. Mesoporous nanocrystalline ceria-zirconia solid solutions supported nickel based catalysts for CO<sub>2</sub> reforming of CH<sub>4</sub>, *Int. J. Hydrogen Energy*, **2012**, 37, 18001-18020.
